# Supplementary material for: Metformin inhibits the development, and promotes the resensitization, of treatment-resistant breast cancer
Source: PubMed Central journal article supplement (PMC5718420; doi:10.1371/journal.pone.0187191), 2017-12-06
Supplement: pone.0187191.s001.pdf [file pone.0187191.s001.pdf]

**Fig 1A**

| group_1a   | mean     | se(mean) |
|------------|----------|----------|
| MetD       | 100.0667 | 1.702834 |
| MetD_dox   | 66       | 1.05505  |
| Met1       | 56.33333 | 1.855921 |
| Met1_dox   | 49       | 2.045751 |
| Met2.5     | 100.6667 | 7.446103 |
| Met2.5_dox | 91.66667 | 2.027588 |
| Met5       | 78.66667 | 2.905933 |
| Met5_dox   | 73.33333 | 2.403701 |
| Total      | 77.04167 | 3.954212 |

**Fig 1B**

| group_1b   | mean     | se(mean) |
|------------|----------|----------|
| Con        | 92.30890 | 4.230709 |
| Con_dr     | 94.70199 | 4.046423 |
| dox1       | 61.58968 | 4.599893 |
| dox1_dr    | 64.90273 | 4.543282 |
| met1       | 54.22389 | 5.611393 |
| met1_dox   | 61.88845 | 3.574023 |
| met1dox    | 60.93969 | 2.949362 |
| met1dox_dr | 55.40839 | 4.211652 |
| Total      | 70.77177 | 4.794564 |

**Fig 2A**

| group_2a  | mean     | se(mean)  |
|-----------|----------|-----------|
| h20_mmt5  | 83.46    | 1.539894  |
| h20_mmt5  | 84.6667  | 1.466667  |
| h47a_mmt5 | 83.83333 | 1.319771  |
| met7_mmt5 | 90.33333 | 7.631764  |
| h20_mmt5  | 42.33333 | 2.899242  |
| h21_mmt5  | 44.16667 | 6.528766  |
| h47a_mmt5 | 15.03333 | 0.7151103 |
| met7_mmt5 | 17.66667 | 2.879594  |
| Total     | 57.76417 | 6.279707  |

**Fig 2C**

| group_2c | mean      | se(mean)  |
|----------|-----------|-----------|
| con      | 0.4123333 | 0.0232389 |
| met1     | 0.186667  | 0.0259572 |
| 20am     | 0.128667  | 0.0090989 |
| met_tam  | 0.066667  | 0.0096607 |
| Total    | 0.1940833 | 0.0409015 |

**Fig 3C**

| group_3c | mean     | se(mean) |
|----------|----------|----------|
| control  | 97.83333 | 2.10776  |
| met5     | 53.46667 | 6.44481  |
| ng50     | 40.79667 | 2.239296 |
| met_tg   | 10.6     | 0.2      |
| Total    | 54.23455 | 9.689529 |

**Fig 5D**

| group_5d | mean      | se(mean)  |
|----------|-----------|-----------|
| con      | 0.888     | 0.0202032 |
| tsat1    | 0.509     | 0.0541539 |
| met5     | 0.728333  | 0.0075351 |
| pho260   | 6.533333  | 0.027945  |
| Total    | 0.6891667 | 0.057387  |

**Fig 5E**

| group_5e | mean      | se(mean)  |
|----------|-----------|-----------|
| con      | 1.02      | 0.011247  |
| tsat1    | 0.633333  | 0.0592546 |
| met5     | 1.1       | 0.03      |
| pho260   | 1.083333  | 0.0133333 |
| Total    | 0.9541667 | 0.0617725 |

**Fig 6C**

| group_6c      | mean     | se(mean) |
|---------------|----------|----------|
| mg_mtd_5d     | 85.78833 | 3.551158 |
| pmc_mtd_5d    | 26.16667 | 2.362292 |
| mg_mtd_10d90  | 41667    | 2.956428 |
| pmc_mtd_10d90 | 16667    | 2.000796 |
| mg_dox_5d     | 96.71    | 7.231954 |
| pmc_dox_5d    | 47.21    | 1.32779  |
| mg_dox_10d90  | 11.2     | 2.724793 |
| mg_dox_10d90  | 6        | 4.097701 |
| Total         | 73.63941 | 4.727071 |

**Fig 6E**

| group_6e  | mean     | se(mean) |
|-----------|----------|----------|
| ser       | 83.96667 | 8.201145 |
| ser_mmt1  | 35.9     | 5.164501 |
| rfbh      | 86       | 6.921223 |
| rfbh_mmt1 | 38.66667 | 3.313737 |
| Total     | 60.98333 | 7.722624 |

**Fig 6F**

| group_6f | mean     | se(mean) |
|----------|----------|----------|
| thy_mmt5 | 97.15    | 1.538415 |
| thy_mmt1 | 34.3     | 7.168496 |
| thy_mmt5 | 30.425   | 6.442615 |
| mtt_mmt5 | 92.50936 | 6.289799 |
| mtt_mmt1 | 54.22389 | 5.611393 |
| mtt_mmt5 | 51.72701 | 2.919197 |
| mtt_mmt5 | 53.16667 | 2.168205 |
| Total    | 59.1848  | 6.289287 |

**Fig 6G**

| group_6g  | mean     | se(mean) |
|-----------|----------|----------|
| tryp_mmt5 | 91.33333 | 2.333333 |
| tryp_mmt5 | 77.4     | 2.952839 |
| tryp_mmt1 | 44.23333 | 3.083468 |
| tryp_mmt5 | 22.1     | 2.60812  |
| mtt_mmt5  | 100.5333 | 2.575742 |
| mtt_mmt5  | 81.23333 | 1.888656 |
| mtt_mmt5  | 53.16667 | 2.168205 |
| Total     | 61.77083 | 5.923677 |

**Overall ANOVA**

F-stat: 31.73  
P-value: <0.00005

**Bonferroni**

| Condition | MFC-MFCDOX | P-value |
|-----------|------------|---------|
| CON       | 0          | 1       |
| 1.0mM Met | -34.67     | <0.0005 |
| 2.5mM Met | -35.33     | <0.0005 |
| 5.0mM Met | -24.33     | 0.004   |

**Overall ANOVA**

F-stat: 68.47  
P-value: <0.00005

**Bonferroni**

| Condition | MFC-MFCDOX | P-value |
|-----------|------------|---------|
| CON       | -2.19      | 1       |
| 1mM DOX   | -33.23     | 0.001   |
| 1mM Met   | -27.67     | 0.009   |
| Met + DOX | -24.40     | 0.027   |

**Overall ANOVA**

F-stat: 68.87  
P-value: <0.00005

**Bonferroni**

| Condition | MetD-Met5 | P-value |
|-----------|-----------|---------|
| 8f-20     | -41.15    | <0.0005 |
| 23f       | -40.5     | <0.0005 |
| 167f3     | -68.8     | <0.0005 |
| MCF7      | -73.17    | <0.0005 |

**Overall ANOVA**

F-stat: 65.12  
P-value: <0.00005

**Bonferroni**

| Comparison           | DIFF | P-Value |
|----------------------|------|---------|
| CON - 1mM Met        | 0.23 | <0.0005 |
| CON - 20uM TAM       | 0.29 | <0.0005 |
| CON - Met + TAM      | 0.35 | <0.0005 |
| 1mM Met - 20uM TAM   | 0.06 | 0.38    |
| 1mM Met - Met + TAM  | 0.12 | 0.023   |
| 20uM TAM - Met + TAM | 0.06 | 0.303   |

**Overall ANOVA**

F-stat: 72.2  
P-value: <0.00005

**Bonferroni**

| Comparison          | DIFF   | P-Value |
|---------------------|--------|---------|
| CON - 1uM TSA       | 44.17  | 0.001   |
| CON - 50uM TRG      | 36.87  | <0.0005 |
| CON - 250uM Ph      | 0.483  | <0.0005 |
| 1uM TSA - 50uM Met  | -0.219 | <0.0005 |
| 1uM TSA - 250uM Ph  | 0.004  | 1       |
| 5mM Met - Met + TRG | 42.87  | 0.001   |
| 5mM Met - Met + TAM | 30.17  | 0.011   |

**Overall ANOVA**

F-stat: 44.78  
P-value: <0.00005

**Bonferroni**

| Comparison         | DIFF   | P-Value |
|--------------------|--------|---------|
| CON - 1uM TSA      | 0.477  | <0.0005 |
| CON - 50uM Met     | 0.258  | <0.0005 |
| CON - 250uM Ph     | -0.61  | 1       |
| 1uM TSA - 50uM Met | -0.487 | <0.0005 |
| 1uM TSA - 250uM Ph | -0.47  | <0.0005 |
| 5mM Met - 250uM Ph | 0.017  | 1       |

**Overall ANOVA**

F-stat: 49.46  
P-value: <0.00005

**Bonferroni**

| Comparison         | DIFF   | P-Value |
|--------------------|--------|---------|
| CON - 1uM TSA      | 0.407  | <0.0005 |
| CON - 50uM Met     | -0.08  | 0.83    |
| CON - 250uM Ph     | -0.61  | 1       |
| 1uM TSA - 50uM Met | -0.487 | <0.0005 |
| 1uM TSA - 250uM Ph | -0.47  | <0.0005 |
| 5mM Met - 250uM Ph | 0.017  | 1       |

**Overall ANOVA**

F-stat: 76.99  
P-value: <0.00005

**Bonferroni**

| Condition | MetDOX-DOX | P-value |
|-----------|------------|---------|
| S/-       | -2.92      | 1       |
| S/+       | -21.04     | 0.018   |
| 10f       | 1.3        | 1       |
| 10f+      | -56.43     | <0.0005 |

**Overall ANOVA**

F-stat: 30.45  
P-value: <0.00005

**Bonferroni**

| Comparison         | DIFF  | P-Value |
|--------------------|-------|---------|
| ser-ser+mmt5       | 48.07 | 0.004   |
| ser-rfbh           | -2.03 | 1       |
| ser-rfbh+mmt5      | 0     | 0.005   |
| ser+mmt1-rfbh-50.1 | 0.003 |         |
| ser+mmt1-rfbh      | 2.17  | 1       |
| rfbh-rfbh+mmt1     | 47.93 | 0.004   |

**Overall ANOVA**

F-stat: 30.45  
P-value: <0.00005

**Bonferroni**

| Condition | Thy-MTT | P-value |
|-----------|---------|---------|
| CON       | 4.64    | 1       |
| 1mM Met   | -28.92  | 0.291   |
| 5mM Met   | -21.302 | 0.203   |

**Overall ANOVA**

F-stat: 166.23  
P-value: <0.00005

**Bonferroni**

| Condition | TBE-MTT | P-value |
|-----------|---------|---------|
| CON       | -8.2    | 0.374   |
| 0.1mM Met | -3.83   | 1       |
| 1mM Met   | -8.83   | 0.442   |
| 5mM Met   | -2.07   | 1       |
